# Supplementary material for: Potential bioaccessibility and bioavailability of polyphenols and functional properties of tiger nut beverage and its by-product during in vitro digestion
Source: Royal Society of Chemistry journal article supplement (doi:10.1039/d4fo01537a), 2024-01-01
Supplement: d4fo01537a1.pdf [file d4fo01537a1.pdf]

## Supplementary information

### Potential bioaccessibility and bioavailability of polyphenols and functional properties of tiger nut beverage and by-product during *in vitro* digestion

Paula Llorens,<sup>a†</sup> Manuela Flavia Chiacchio,<sup>b†</sup> Silvia Tagliamonte,<sup>b</sup> Ana Juan-García,<sup>a</sup> Noelia Pallarés,<sup>a</sup> Juan Carlos Moltó,<sup>a</sup> Paola Vitaglione,<sup>\*b</sup> and Cristina Juan<sup>a</sup>

<sup>a</sup> Laboratory of Food Chemistry and Toxicology, Faculty of Pharmacy, University of Valencia, Avda. Vicent Andrés Estellés, s/n, 46100 Burjassot, Spain.

<sup>b</sup> Department of Agricultural Sciences, University of Naples Federico II, 80055 Portici, Italy.

<sup>†</sup> These authors equally contributed to this work.

#### \*Corresponding author:

Prof Paola Vitaglione, PhD

Department of Agricultural Sciences, University of Naples Federico II

Parco Gussone Ed. 84, Portici (NA), 80055, Italy

Telephone: +39 081 2539357;

E-mail: [paola.vitaqlione@unina.it](mailto:paola.vitaqlione@unina.it)

**Table S1.** Retention times and LOD-LOQ of identified polyphenols by HPLC UV/VIS.

| <b>Polyphenol</b>                      | <b>Retention time<br/>(min)</b> | <b>LOD<br/>(mg/mL)</b> | <b>LOQ<br/>(mg/mL)</b> |
|----------------------------------------|---------------------------------|------------------------|------------------------|
| <b>Caffeic acid hexoside</b>           | 3.8                             | 0.03                   | 0.09                   |
| <b>Ferulic acid acyl-b-D-glucoside</b> | 5.1                             | 0.05                   | 0.1                    |
| <b>Protocatechuic acid</b>             | 5.8                             | 0.1                    | 0.3                    |
| <b>3-Hydroxybenzoic acid</b>           | 9.7                             | 0.05                   | 0.1                    |
| <b>4-Hydroxybenzoic acid</b>           | 10.3                            | 0.05                   | 0.1                    |
| <b>Vanillic acid</b>                   | 11.4                            | 0.05                   | 0.12                   |
| <b><i>p</i>-Coumaric acid</b>          | 15.6                            | 0.02                   | 0.06                   |
| <b><i>Trans</i>-ferulic acid</b>       | 16.6                            | 0.05                   | 0.1                    |
| <b>Epicatechin derivative</b>          | 17.4                            | 0.03                   | 0.09                   |
| <b>Ethyl vanillin</b>                  | 17.8                            | 0.05                   | 0.12                   |
| <b>Luteolin</b>                        | 26.7                            | 0.05                   | 0.1                    |
| <b><i>Trans</i>-cinnamic acid</b>      | 28.8                            | 0.001                  | 0.003                  |

LOD: Limit of detection; LOQ: Limit of quantification

**Table S2.** Acquisition parameters used for the LC-MS/MS analysis of polyphenols.

| <b>Polyphenol</b>                      | <b>Precursor ions [M-H]<sup>-</sup> (m/z)</b> | <b>Product ions [M-H]<sup>-</sup> (m/z)</b> | <b>RT (min)</b> | <b>CE</b> | <b>DP</b> | <b>CXP</b> |
|----------------------------------------|-----------------------------------------------|---------------------------------------------|-----------------|-----------|-----------|------------|
| <b>Caffeic acid hexoside</b>           | 341                                           | 179, 135                                    | 3.5             | -25       | -50       | -7         |
| <b>Ferulic Acid Acyl-b-D-glucoside</b> | 355                                           | 191                                         | 6.5             | -25       | -50       | -15        |
| <b>Protocatechuic acid</b>             | 153                                           | 109                                         | 7.1             | -21       | -40       | -11        |
| <b>3-Hydroxybenzoic acid</b>           | 137                                           | 93                                          | 9.7             | -20       | -35       | -7         |
| <b>4-Hydroxybenzoic acid</b>           | 137                                           | 93                                          | 9.7             | -20       | -35       | -7         |
| <b>Vanillic acid</b>                   | 167                                           | 152,108                                     | 10.2            | -18       | -40       | -7         |
| <b>p-Coumaric acid</b>                 | 163                                           | 119, 113                                    | 13.3            | -24       | -40       | -6         |
| <b>Trans-ferulic acid</b>              | 193                                           | 134, 178                                    | 14.2            | -22       | -40       | -13        |
| <b>Epicatechin derivative</b>          | 289                                           | 245                                         | 15.1            | -20       | -50       | -12        |
| <b>Ethyl vanillin</b>                  | 165                                           | 152, 137                                    | 15.4            | -20       | -40       | -15        |
| <b>Luteolin</b>                        | 285                                           | 133, 151                                    | 24.4            | -44       | -50       | -15        |
| <b>Trans-cinnamic acid</b>             | 147                                           | 103                                         | 25.8            | -25       | -60       | -7         |

RT: Retention time; CE: Collision energy; DP : Declustering potential; CXP: Collision-cell exit potential.

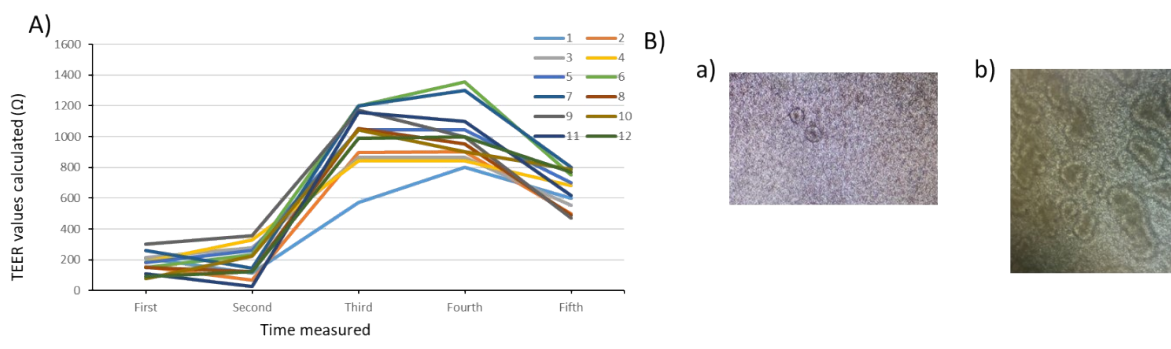

**Fig. S1.** A) TEER values ( $\Omega$ ) obtained in different days during the differentiation period and per well. Graph reports measurements for two plates and for 5 times selected from the fourteen days for complete domes formation. B) Images of dome formation after 5 days of seeding cells in transwell (a) and the day of the experiment (b).

**a.**

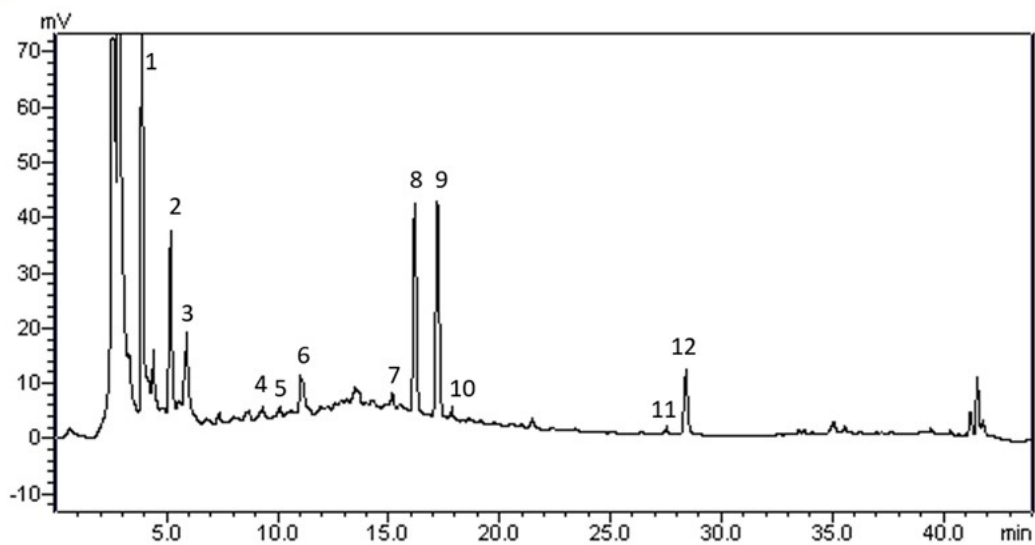

**b.**

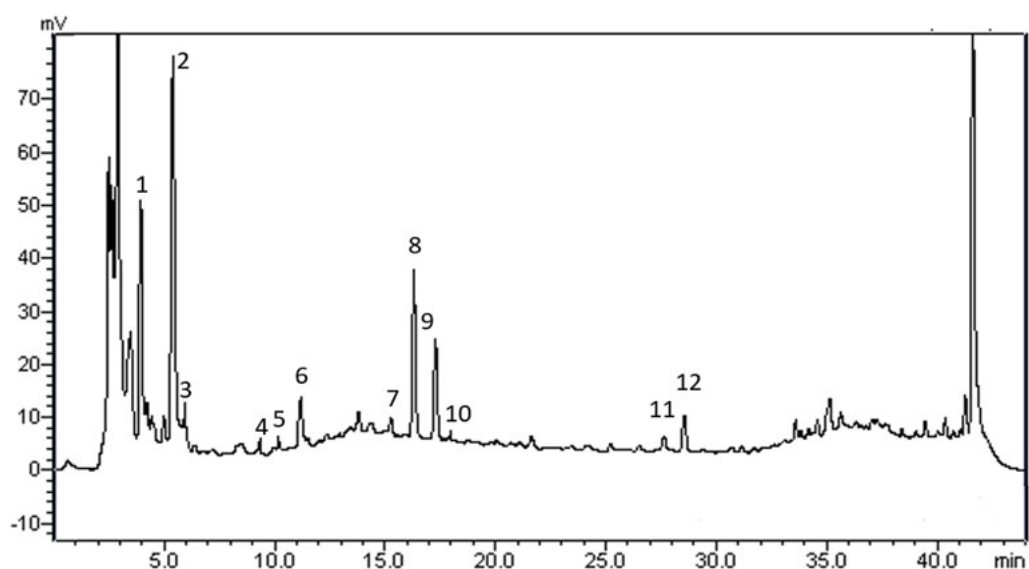

**Fig. S2.** Typical HPLC-UV/VIS chromatogram obtained from the analysis of polyphenols from **a.** TNB **b.** and TNBP.

Peak 1–Caffeic acid hexoside; peak 2–Ferulic Acid Acyl-b-D-glucoside; peak 3–Protocatechuic acid; peak 4–3-Hydroxybenzoic acid; peak 5–4-Hydroxybenzoic acid; peak 6–Vanillic acid; peak 7–p-Coumaric acid; peak 8–*Trans*-ferulic acid; peak 9–Epicatechin derivative; peak 10–Ethyl vanillin; peak 11–Luteolin; peak 12–*Trans*-cinnamic acid
